# Supplementary material for: Portable and rapid solid sample preparation system utilizing twin-screw mechanism for diagnostic applications
Source: Royal Society of Chemistry journal article supplement (doi:10.1039/d4an01579g), 2025-01-01
Supplement: d4an01579g1.pdf [file d4an01579g1.pdf]

## Supplementary Information

### Ultraportable and Rapid Solid Sample Preparation System Utilizing Twin-Screw Mechanism for Diagnostic Applications

*Ji Hyo Park*<sup>1, 2#</sup>, *Yeong-Eun Yoo*<sup>1, 3#</sup>, *Jae-Ho Jin*<sup>4</sup>, *Da-In Kwon*<sup>1</sup>, *Jae Sung Yoon*<sup>1, 3</sup>, *Do Hyun Kang*<sup>1</sup>, *Younju Lee*<sup>5\*</sup>, and *Kwanoh Kim*<sup>1\*</sup>

<sup>1</sup> Nano Lithography and Manufacturing Research Center, Korea Institute of Machinery and Materials, 156 Gajeongbuk-ro, Daejeon, 34103, South Korea

<sup>2</sup> Department of Materials Science and Engineering and Research Institute of Advanced Materials, Seoul National University, 1 Gwanak-ro, Seoul, 08826, South Korea

<sup>3</sup> Department of Nanomechatronics, University of Science and Technology, Deajeon, 34103, South Korea

<sup>4</sup> Neo Nanotech, 156 Gajeongbuk-ro, Daejeon, 34103, South Korea

<sup>5</sup> Department of Surgery, Chungnam National Univeristy Sejong Hospital, 20 Bodeum 7-ro, Sejong, 30099, South Korea

# These authors contributed equally.

\* Correspondence can be addressed to: [kkim@kimm.re.kr](mailto:kkim@kimm.re.kr) and [jaennejuya@cnuh.co.kr](mailto:jaennejuya@cnuh.co.kr).

| <b>(a) <i>E. coli</i></b>                                                         |                          | Sample type<br>(volume) | Colony count<br>[CFU/50 $\mu$ L] | Concentration<br>[CFU/mL] | Total bacteria<br>[CFU/sample] |
|-----------------------------------------------------------------------------------|--------------------------|-------------------------|----------------------------------|---------------------------|--------------------------------|
| 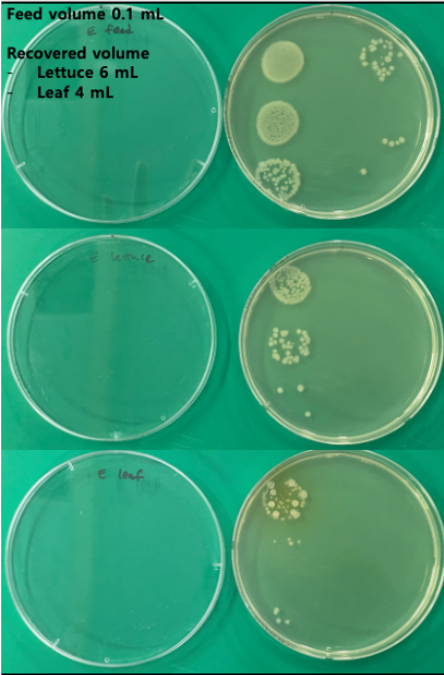 | <b>Feed</b><br>(0.1 mL)  | set 1                   | $3.5 \times 10^5$                | $7.0 \times 10^6$         | $7.0 \times 10^5$              |
|                                                                                   |                          | set 2                   | $4.0 \times 10^5$                | $8.0 \times 10^6$         | $8.0 \times 10^5$              |
|                                                                                   | <b>Lettuce</b><br>(6 mL) | set 1                   | $3.7 \times 10^3$                | $7.4 \times 10^4$         | $4.44 \times 10^5$             |
|                                                                                   |                          | set 2                   | $3.0 \times 10^3$                | $6.0 \times 10^4$         | $3.6 \times 10^5$              |
|                                                                                   | <b>Leaf</b><br>(4 mL)    | set 1                   | $5.2 \times 10^2$                | $1.04 \times 10^4$        | $4.16 \times 10^4$             |
|                                                                                   |                          | set 2                   | $4.0 \times 10^2$                | $8.0 \times 10^3$         | $3.2 \times 10^4$              |

  

| <b>(b) <i>S. epidermidis</i></b>                                                    |                          | Sample type<br>(volume) | Colony count<br>[CFU/50 $\mu$ L] | Concentration<br>[CFU/mL] | Total bacteria<br>[CFU/sample] |
|-------------------------------------------------------------------------------------|--------------------------|-------------------------|----------------------------------|---------------------------|--------------------------------|
|  | <b>Feed</b><br>(0.1 mL)  | set 1                   | $9.0 \times 10^5$                | $1.8 \times 10^7$         | $1.8 \times 10^6$              |
|                                                                                     |                          | set 2                   | $4.3 \times 10^3$                | $8.6 \times 10^4$         | $5.16 \times 10^5$             |
|                                                                                     | <b>Lettuce</b><br>(6 mL) | set 1                   | $4.3 \times 10^3$                | $8.6 \times 10^4$         | $5.16 \times 10^5$             |
|                                                                                     |                          | set 2                   | $4.0 \times 10^3$                | $8.0 \times 10^4$         | $4.8 \times 10^5$              |
|                                                                                     | <b>Leaf</b><br>(4 mL)    | set 1                   | $8.7 \times 10^2$                | $1.74 \times 10^4$        | $6.96 \times 10^4$             |
|                                                                                     |                          | set 2                   | $8.0 \times 10^2$                | $1.6 \times 10^4$         | $5.4 \times 10^4$              |

**Figure S1.** Agar plates showing colony-forming units (CFU) of (a) *E. coli* and (b) *S. epidermidis* recovered from lettuce and leaf samples after processing, along with the detailed colony counting results (raw data corresponding to Figure 2e in the article).

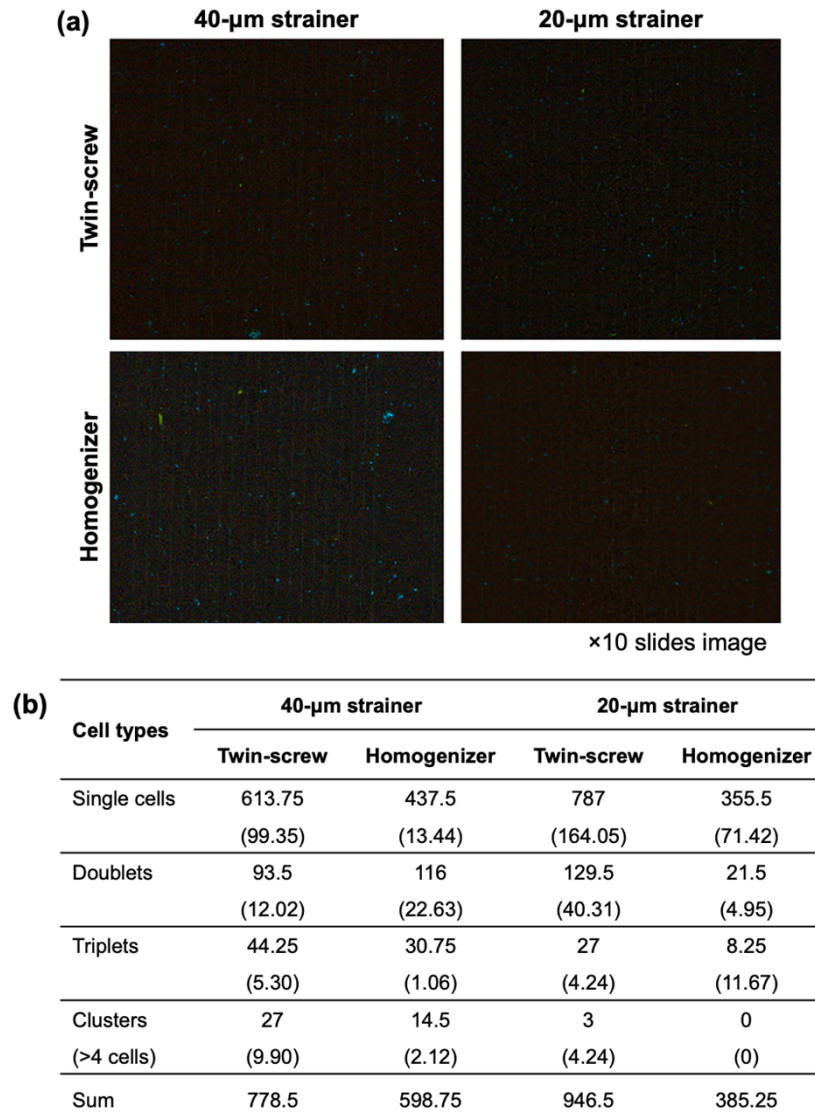

**Figure S2.** Cell counting process for evaluating the tissue dissociation efficiency of the twin-screw device and homogenizer (raw data corresponding to Figure 3d and 3e in the article): (a) Fluorescence microscopy images of dissociated tissue suspensions loaded onto a hemocytometer for counting DAPI-stained nuclei. (b) Quantitative analysis of cell types based on mean counts and standard deviations. Data are presented as Mean (Standard deviations).

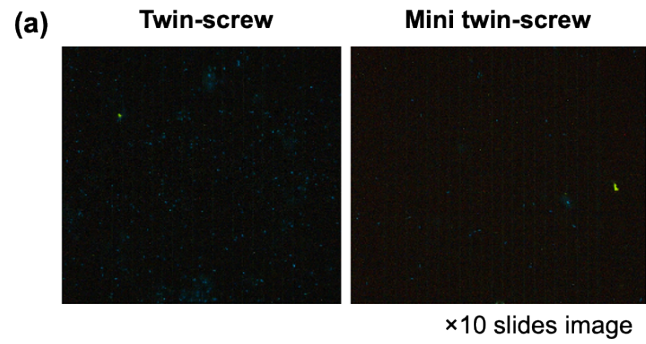

| (b) Cell types     | Twin-screw | Mini twin-screw |
|--------------------|------------|-----------------|
| Single cells       | 622        | 176             |
| Doublets           | 198        | 16              |
| Triplets           | 141        | 9               |
| Clusters(>4 cells) | 199        | 11              |

**Figure S3.** Cell counting process for evaluating the single cell ratio obtained by the twin-screw and miniaturized twin-screw modules (raw data corresponding to Figure 4c in the article): (a) Fluorescence microscopy images of dissociated tissue suspension loaded onto a hemocytometer for counting DAPI-stained nuclei. (b) Quantitative analysis of cell types based on total counts.
